# Supplementary material for: CTCF facilitates DNA double-strand break repair by enhancing homologous recombination repair
Source: PubMed Central journal article supplement — Sci Adv. 2017 May 24;3(5):e1601898. doi: 10.1126/sciadv.1601898 (PMC5443639; doi:10.1126/sciadv.1601898), 2017-05-24
Supplement: 1601898_SM.pdf [file 1601898_SM.pdf]

## Supplementary Materials for **CTCF facilitates DNA double-strand break repair by enhancing homologous recombination repair**

Khalid Hilmi, Maika Jangal, Maud Marques, Tiejun Zhao, Amine Saad, Chenxi Zhang, Vincent M. Luo, Alasdair Syme, Carlis Rejon, Zhenbao Yu, Asiev Krum, Marc R. Fabian, Stéphane Richard, Moulay Alaoui-Jamali, Alexander Orthwein, Luke McCaffrey, Michael Witcher

Published 24 May 2017, *Sci. Adv.* **3**, e1601898 (2017)

DOI: 10.1126/sciadv.1601898

### **This PDF file includes:**

- fig. S1. Live-cell imaging of CTCF at laser micro-irradiation tracks.
- fig. S2. CTCF association with PARylation increases as a response to DNA-damaging agents.
- fig. S3. Impact of CTCF loss on  $\gamma$ H2AX and 53BP1 foci resolution.
- fig. S4. Loss of CTCF increases sensitivity to PARP inhibitors.
- fig. S5. Loss of CTCF impairs Rad51 foci formation following infrared.
- fig. S6. DNA damage increases the association between CTCF and BRCA2.
- table S1. sgRNA sequences targeting Cas9 to CTCF.

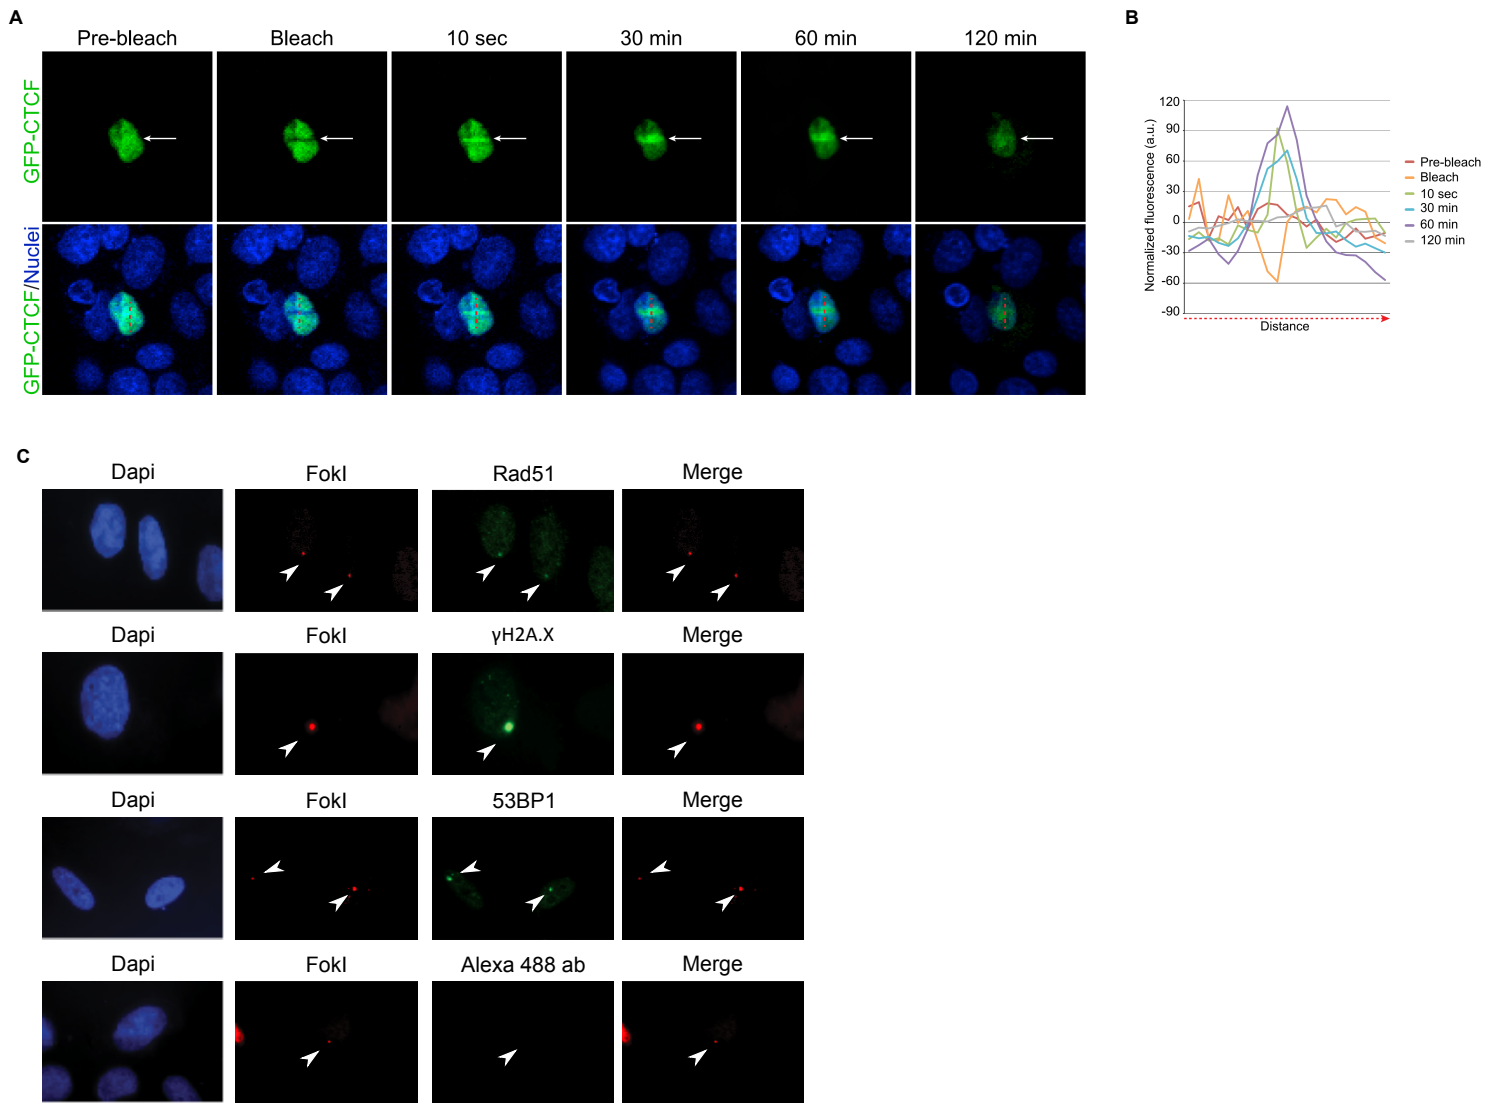

fig. S1. Live-cell imaging of CTCF at laser micro-irradiation tracks.

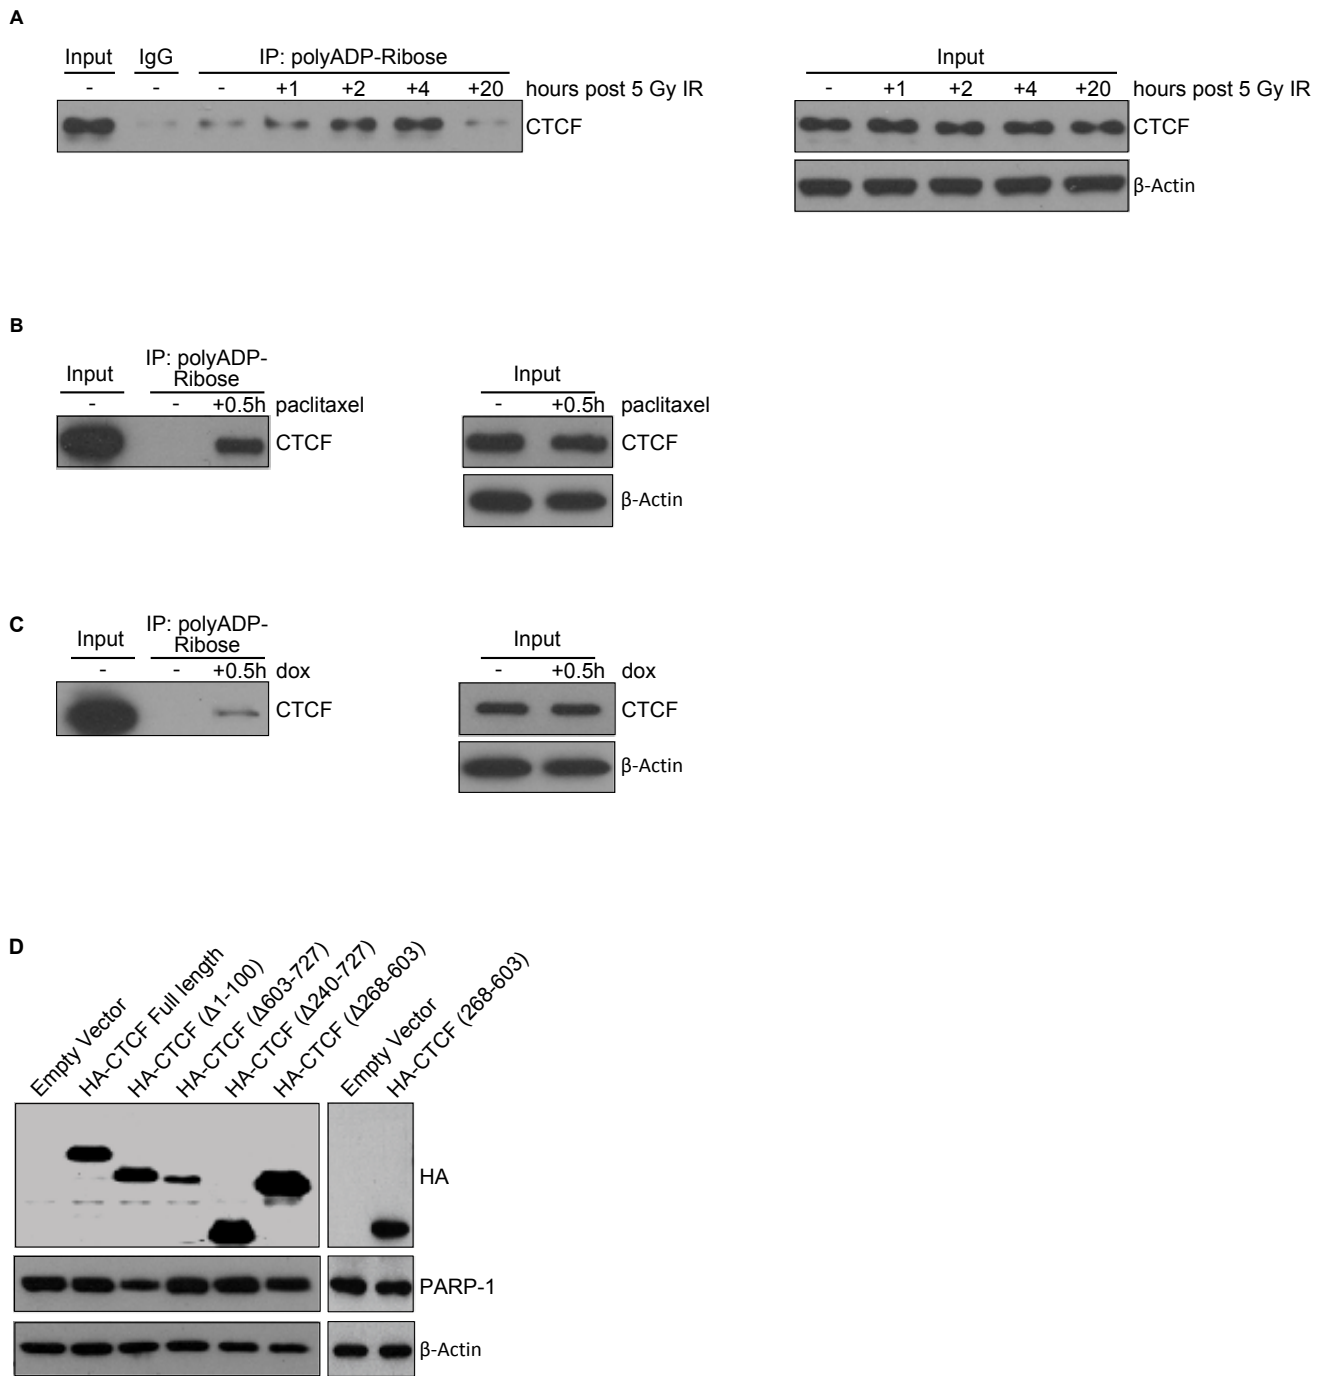

fig. S2. CTCF association with PARylation increases as a response to DNA-damaging agents.

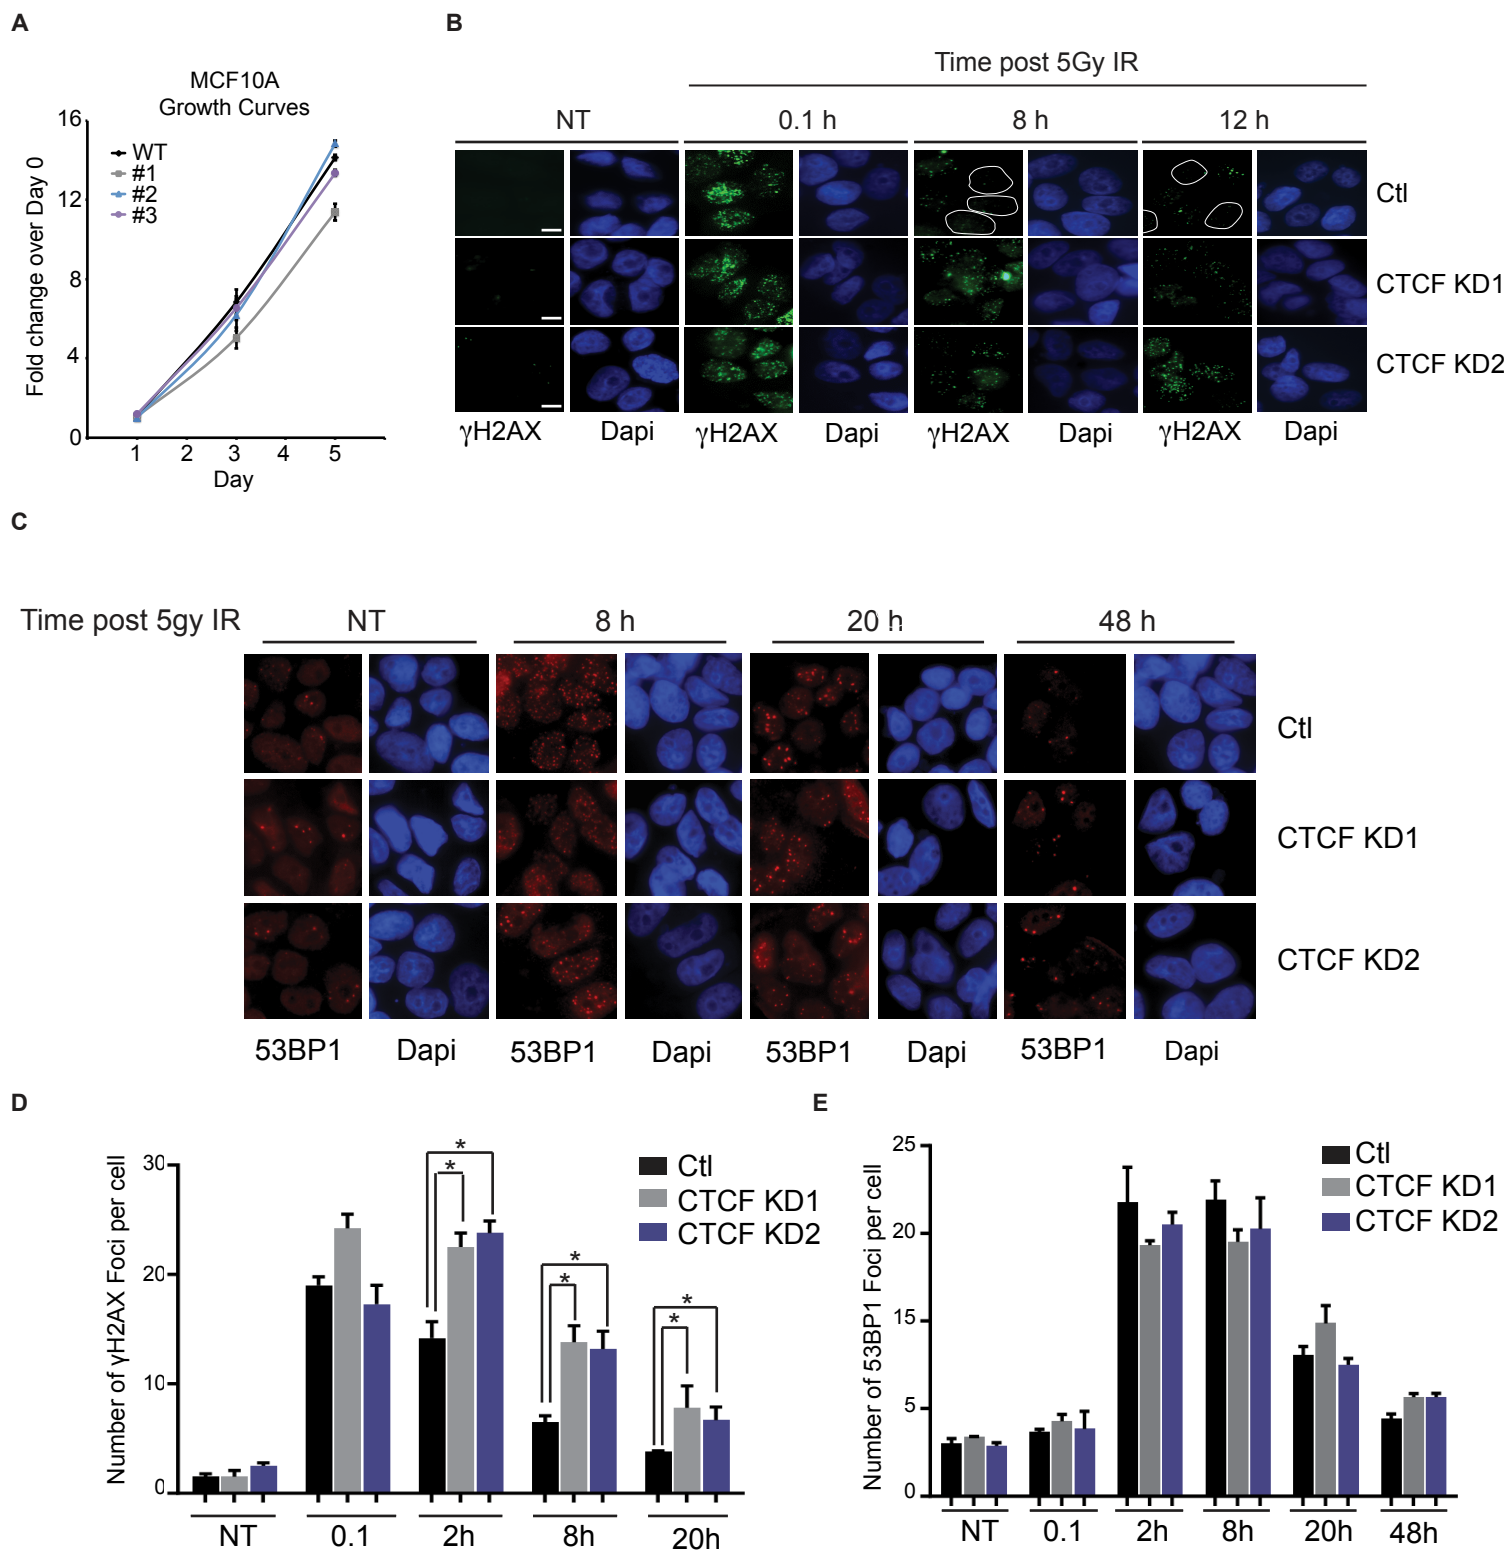

fig. S3. Impact of CTCF loss on  $\gamma$ H2AX and 53BP1 foci resolution.



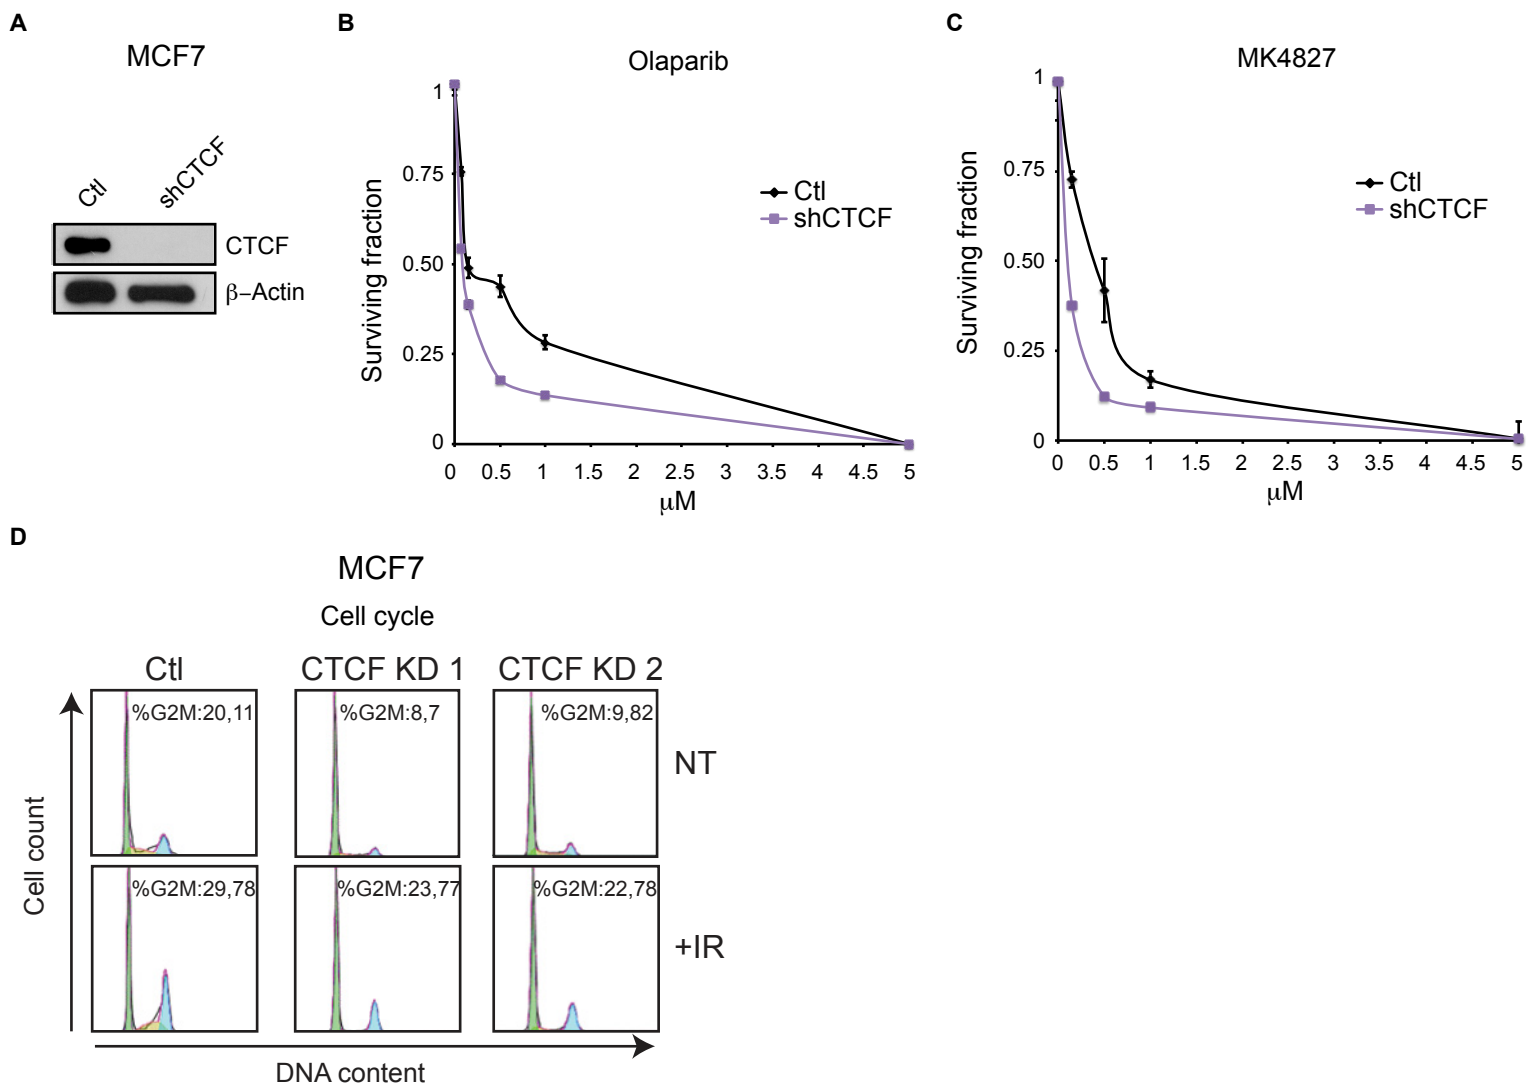

fig. S4. Loss of CTCF increases sensitivity to PARP inhibitors.

**A**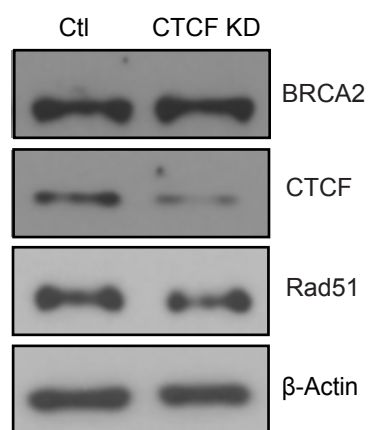**B**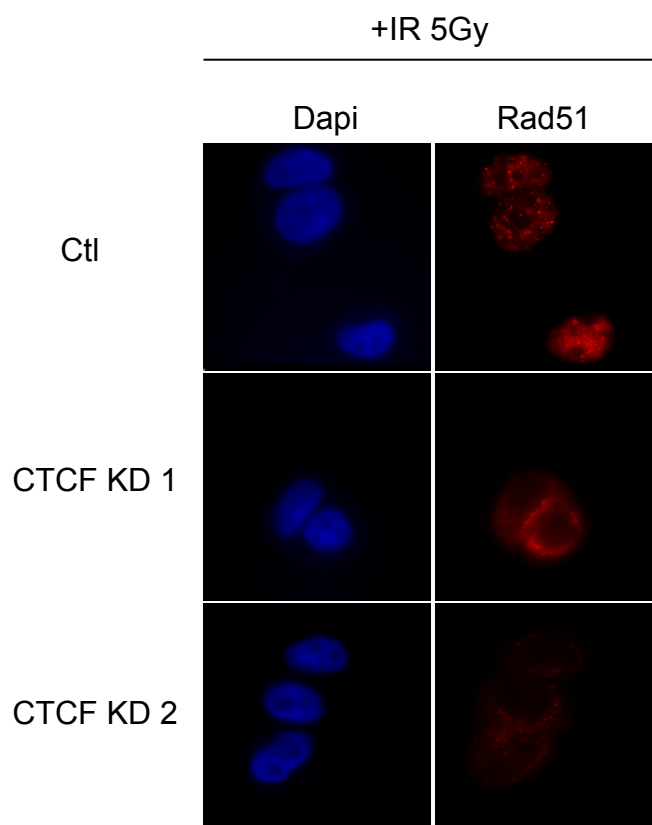

fig. S5. Loss of CTCF impairs Rad51 foci formation following infrared.

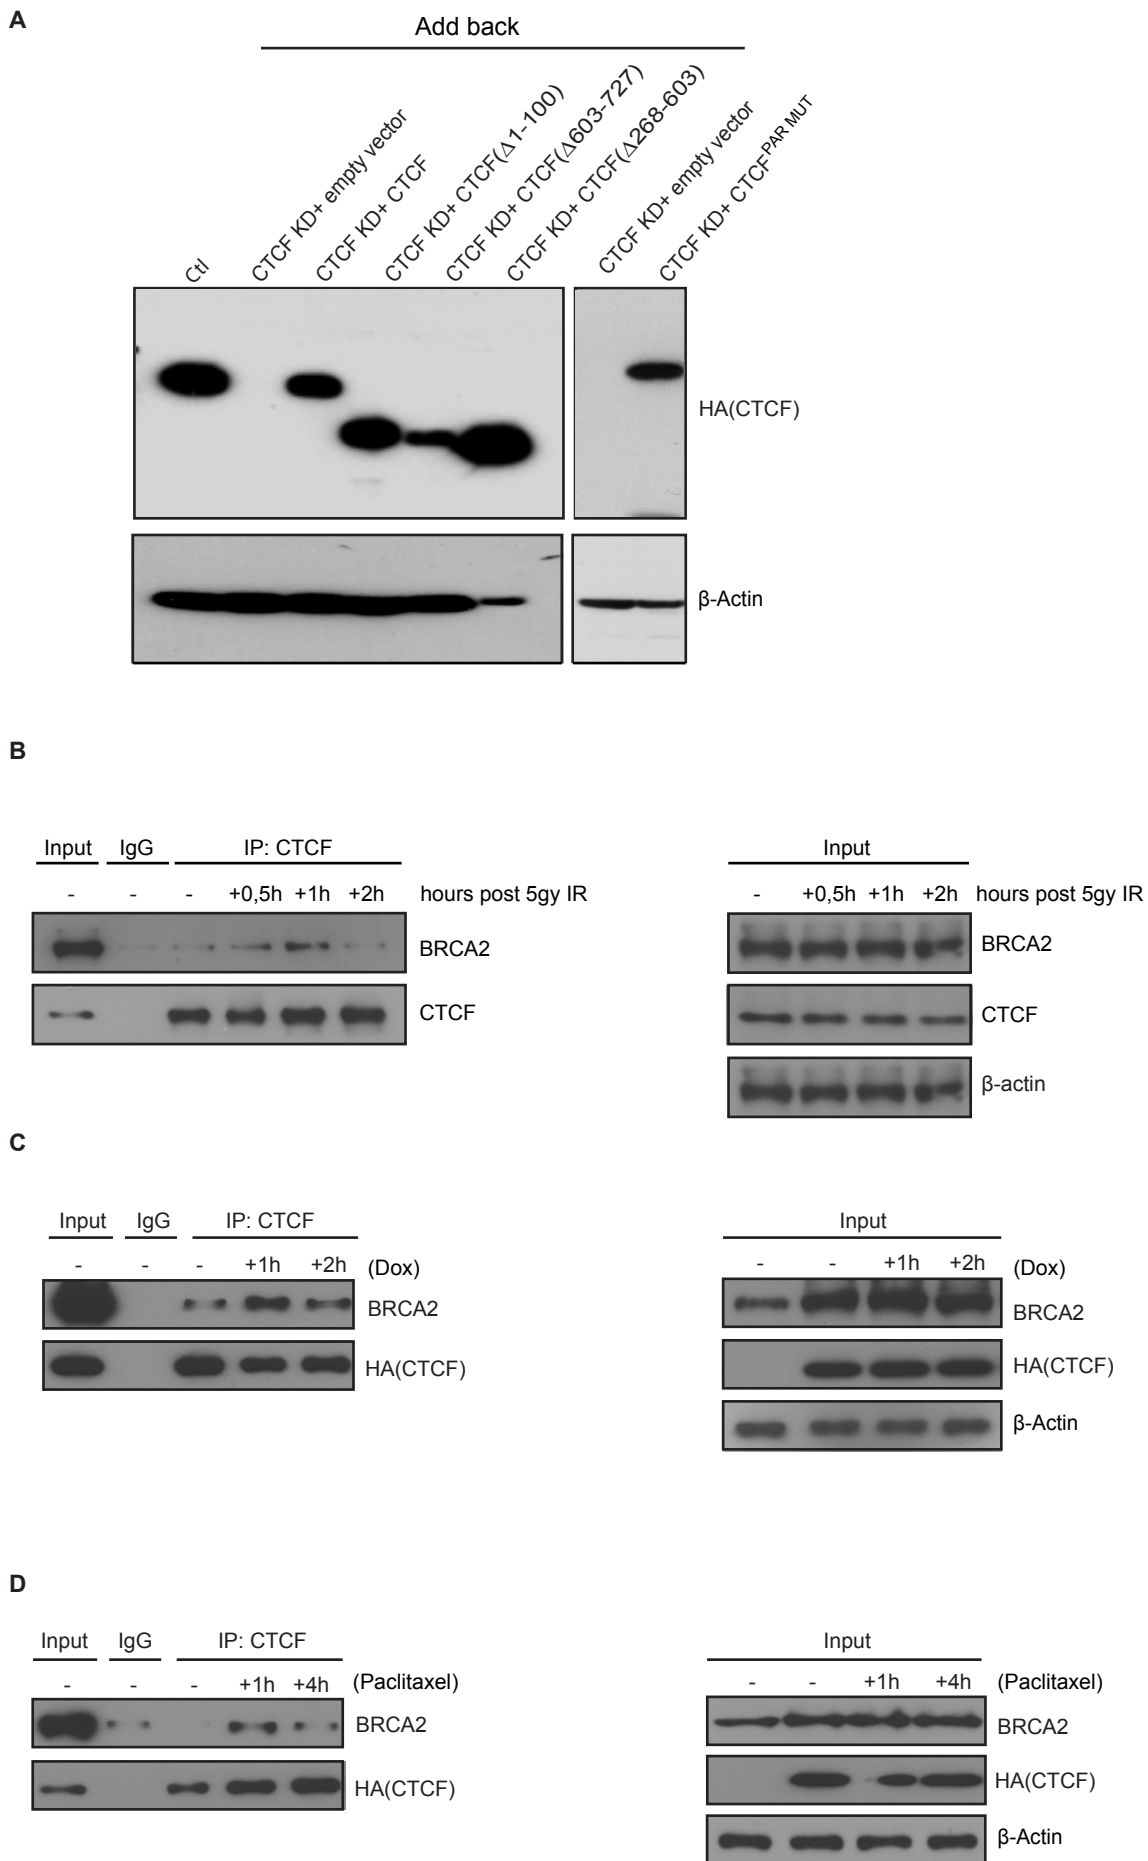

fig. S6. DNA damage increases the association between CTCF and BRCA2.

**table S1. sgRNA sequences targeting Cas9 to CTCF.**

|                                |                                                                                                                                                                                                                                                                                                                                                                                                                                                                                                                 |
|--------------------------------|-----------------------------------------------------------------------------------------------------------------------------------------------------------------------------------------------------------------------------------------------------------------------------------------------------------------------------------------------------------------------------------------------------------------------------------------------------------------------------------------------------------------|
| U6 promoter and target sgRNA-1 | TGTACAAAAAAGCAGGCTTTAAAGGAACCAATTCAGTCGACTGG<br>ATCCGGTACCAAGGTCGGGCAGGAAGAGGGCCTATTTCCCATGA<br>TTCCTTCATATTTGCATATACGATACAAGGCTGTTAGAGAGATA<br>ATTAGAATTAATTTGACTGTAAACACAAAGATATTAGTACAAA<br>ATACGTGACGTAGAAAGTAATAATTTCTTGGGTAGTTTGCAGTT<br>TTAAAATTATGTTTTAAAATGGACTATCATATGCTTACCGTAAC<br>TTGAAAGTATTTTCGATTTCTTGGCTTTATATATCTTGTGGAAAG<br>GACGAAACACCGTGGAGAAGTCCTACCTGAAGTTTTAGAGCTAG<br>AAATAGCAAGTTAAAATAAGGCTAGTCCGTTATCAACTTGAAA<br>AAGTGGCACCGAGTCGGTGCTTTTTTTCTAGACCCAGCTTTCTT<br>GTACAAAGTTGGCATT |
| U6 promoter and target sgRNA-2 | TGTACAAAAAAGCAGGCTTTAAAGGAACCAATTCAGTCGACTGG<br>ATCCGGTACCAAGGTCGGGCAGGAAGAGGGCCTATTTCCCATGA<br>TTCCTTCATATTTGCATATACGATACAAGGCTGTTAGAGAGATA<br>ATTAGAATTAATTTGACTGTAAACACAAAGATATTAGTACAAA<br>ATACGTGACGTAGAAAGTAATAATTTCTTGGGTAGTTTGCAGTT<br>TTAAAATTATGTTTTAAAATGGACTATCATATGCTTACCGTAAC<br>TTGAAAGTATTTTCGATTTCTTGGCTTTATATATCTTGTGGAAAG<br>GACGAAACACCGTGTGATTACGCTTGTAGACGTTTTAGAGCTAG<br>AAATAGCAAGTTAAAATAAGGCTAGTCCGTTATCAACTTGAAA<br>AAGTGGCACCGAGTCGGTGCTTTTTTTCTAGACCCAGCTTTCTT<br>GTACAAAGTTGGCATT |
| PCR primers                    |                                                                                                                                                                                                                                                                                                                                                                                                                                                                                                                 |
| Cas9 target-1-Fwd              | TATGCCAGCAGGGACACATA                                                                                                                                                                                                                                                                                                                                                                                                                                                                                            |
| Cas9 target-1-Rev              | CAGAGGATATGCCGGAGAAG                                                                                                                                                                                                                                                                                                                                                                                                                                                                                            |
| Cas9 target-2-Fwd              | TTCACATTACCCTGGGCTTT                                                                                                                                                                                                                                                                                                                                                                                                                                                                                            |
| Cas9 target-2-Rev              | ACCGAGAAAGCACCAACAAC                                                                                                                                                                                                                                                                                                                                                                                                                                                                                            |
